# Supplementary material
Source: PubMed Central journal article supplement (PMC4472001)
Supplement: NIHMS696743-supplement-5.pdf [file NIHMS696743-supplement-5.pdf]

PPXD (Partial Sequences)

C-loop

|                                   |     |                                                      |     |
|-----------------------------------|-----|------------------------------------------------------|-----|
| <i>Thermotoga maritima</i>        | 333 | YHLINALKALHLFKKDVYVVM-NGEVIIVDEFTGRLLPGRRYSGGLHQA    | 381 |
| <i>Escherichia coli</i>           | 308 | HHVTAALRAHALFTRVDYIVK-DGEVIIVDEHTGRMQGRRWSDGLHQA     | 356 |
| <i>Bacillus subtilis</i>          | 288 | HHINQALKAHVAMQKDVYVVEDG-QVVIIVDSFTGRMLKGRRYSEGLHQA   | 336 |
| <i>Thermus thermophilus</i>       | 302 | HMLIQAIRAKELYHRDRDYIVQ-DGQVIIVDEFTGRMLPGRRYSEGLHQA   | 350 |
| <i>Salmonella enterica</i>        | 308 | HHVTAALRAHALFTRVDYIVK-DGEVIIVDEHTGRMQGRRWSDGLHQA     | 356 |
| <i>Haemophilus influenzae</i>     | 306 | HHVMAALRAHLFEKDVYIVK-DGEVIIVDEHTGRTMAGRRWSDGLHQA     | 354 |
| <i>Neisseria meningitidis</i>     | 303 | HHLMAALRAHSLFHKDQHYVIQ-DGEVIIVDEFTGRIMSGRRWSEGLHQA   | 351 |
| <i>Helicobacter pylori</i>        | 297 | HHLQALKANYLFFIDKDYIVA-NNEVVIIVDEFTGRLSEGRRFSEGLHQA   | 345 |
| <i>Campylobacter jejuni</i>       | 302 | HQLDQALKAHNLFEKDVHYVLR-NNEVIIVDEFTGRLSEGRRFSEGLHQA   | 350 |
| <i>Brucella melitensis</i>        | 297 | HHLNNAALRAHLFQRDKDYIVR-NDEVIIVDEFTGRMMPGRRYSEGLHQA   | 345 |
| <i>Mesorhizobium loti</i>         | 297 | HHVNNALKAHLFLKDKDYIVR-NGEVIIVDEFTGRMMPGRRYSEGLHQA    | 345 |
| <i>Rickettsia prowazekii</i>      | 295 | HYVNNALKAHMFMTIDVDYIVR-EGKVIIVDEFTGRVMEGRRYSEGLHQA   | 343 |
| <i>Agrobacterium tumefaciens</i>  | 297 | HHINNALKAKHLFTRDKDYIVR-NDEVIIVDEFTGRMMPGRRYSEGLHQA   | 345 |
| <i>Sinorhizobium meliloti</i>     | 297 | HHVNNALKAHLFTRDKDYIVR-NGEVIIVDEFTGRMMPGRRYSEGLHQA    | 345 |
| <i>Aquifex aeolicus</i>           | 351 | HAILQSIIRAHHLFKKDVHYIVR-DGEVLIIVDEFTGRVLPGRRWSDGLHQA | 399 |
| <i>Synechocystis</i>              | 292 | HYIFNAIKAKHLFLKDNVYIVR-NGEVIIVDEFTGRIMVGRRWSDGLHQA   | 340 |
| <i>Nostoc sp. PCC 7120</i>        | 285 | HFVFNAIKAKHLFLKDNVYIVR-NGEVIIVDEFTGRVLPGRRWSDGLHQA   | 333 |
| <i>Deinococcus radiodurans</i>    | 303 | HMITQAIRARELYHREKDYIVNAEGEVVIVDEFTGRSMPGRRYSEGLHQA   | 352 |
| <i>Chlamydia trachomatis</i>      | 427 | HGLRQLLRAHLLMEKIDYIVR-DDQVIIVDEHTGRPQSGRRFSEGLHQA    | 475 |
| <i>Treponema pallidum</i>         | 315 | HYFTQALRAHLLYRADVDYVVK-DGQVQIVDEFTGRILEGRRYSDGLHQA   | 363 |
| <i>Borrelia burgdorferi</i>       | 312 | HYMTQALKAHLLFLKNREYIVG-DSGVEIVDEFTGRVLTGRRYSDGLHQA   | 360 |
| <i>Corynebacterium glutamicum</i> | 288 | SYLNNAIKAQELFTRDKDYIVR-NGEVMIVDGFTGRVLAGRRYNEGMHQA   | 336 |
| <i>Mycobacterium leprae</i>       | 289 | SYLNNALKAKELFNDRDKDYIVR-DGEVLIIVDEFTGRVLIGRRYNEGMHQA | 337 |
| <i>Clostridium acetobutylicum</i> | 288 | HHTSQALKANYLMKRDYIMVKED-EVVIIVDEFTGRIMEGRRYSDGLHQA   | 336 |
| <i>Staphylococcus aureus</i>      | 294 | SHINTALRAHVTLQRVDYIMVVDG-EVLIIVDQFTGRTMPGRRFSEGLHQA  | 342 |
| <i>Listeria innocua</i>           | 288 | HIIAQLKALRAHLLFLKDNVYVQDD-EVLIIVDQFTGRIMKGRRFSEGLHQA | 336 |
| <i>Lactococcus lactis</i>         | 300 | HFVDNALRANFIMLHDIDYVVDENQEVLIIDQFTGRTMPGRRYSDGLHQA   | 349 |
| <i>Streptococcus pneumoniae</i>   | 288 | HFIDNALRANFIMLLDIDYVVDSEEQEILIVDQFTGRIMEGRRYSDGLHQA  | 337 |
| <i>Mycoplasma pulmonis</i>        | 287 | HRIQNALRANFIMKDVVEYIVK-DEKIELIDAFTRIMEGRAYSEGLQQA    | 335 |
| <i>Mycoplasma pneumoniae</i>      | 289 | HKIINALTAVKVFEEQKEYIVR-DGKVLIVDHFTRILEGRYSNGLHQA     | 337 |

: \* .\*: : : \* .\*\*\* \*\* : . \* : \*\*

NBD2 (Partial Sequences)

|                                   |     |                                                    |     |
|-----------------------------------|-----|----------------------------------------------------|-----|
| <i>Thermotoga maritima</i>        | 454 | RTQKEKYEKIVEEIEKRYKKQPVLVGTTSIEKSELSSMLK-----      | 495 |
| <i>Escherichia coli</i>           | 429 | MTEAEKIQAI IEDIKERTAKQPVLVGTISIEKSELVSNELTK-----   | 471 |
| <i>Bacillus subtilis</i>          | 409 | RTMEGKFKAVAEDVAQRYMTGQPVLVGTVAVETSELISKLLKN-----   | 451 |
| <i>Thermus thermophilus</i>       | 423 | RTEKGFYAVVEEIAEKYERGPVLVGTISIEKSERLSQMLKEPRLYLPR   | 472 |
| <i>Salmonella enterica</i>        | 429 | MTEAEKIQAI IEDIKERTANGQPVLVGTISIEKSEVVSRELTK-----  | 471 |
| <i>Haemophilus influenzae</i>     | 357 | ENEQYKFNAI IEDIKDCVERQPVLVGTISIEKSELKALDK-----     | 399 |
| <i>Neisseria meningitidis</i>     | 354 | RSAAEKFEAVVKDIEECHKRGQPVLVGTTSIENSELVSHLLQ-----    | 396 |
| <i>Helicobacter pylori</i>        | 348 | KSEKEKFDAILKIKELHDKQPVLVGTASIEKSETLHALLKK-----     | 390 |
| <i>Campylobacter jejuni</i>       | 423 | KTQNEKFKAVIEEIKKANAKQPVLVGTASIERSEVFNHMLVK-----    | 465 |
| <i>Brucella melitensis</i>        | 418 | RTVEEKYRAIVRDIRASHEKQPILVGTTSIEKSEQLAERLRR-----    | 460 |
| <i>Mesorhizobium loti</i>         | 348 | RTVEEKYKAIVKEIREASAKQPVLVGTTSIEKSEQLADRLR-----     | 390 |
| <i>Rickettsia prowazekii</i>      | 416 | GSKQEKYDAIKLIKICYNRGPVILVGTISIEKSELSSILNK-----     | 458 |
| <i>Agrobacterium tumefaciens</i>  | 418 | RTGEEKFLAITEIKAHERGQPVLVGTTSIEKSELHAHLRQ-----      | 460 |
| <i>Sinorhizobium meliloti</i>     | 348 | RTVGEKFKAI IDEIKSAHERGQPMLVGTTSIEKSELADMLKK-----   | 390 |
| <i>Aquifex aeolicus</i>           | 402 | KTKEEKWERVVEVLLNHIFGRPVILVGTVSI EDNEKLSLLKLNK----- | 447 |
| <i>Synechocystis</i>              | 413 | KNEEAKKVALECEELHQGRPILVGTTSIEKSEVISRLLQS-----      | 455 |
| <i>Nostoc sp. PCC 7120</i>        | 406 | KKEIGKQAIARECAEMHELGRPVLVGTTSIEKSEYLSLLRE-----     | 448 |
| <i>Deinococcus radiodurans</i>    | 425 | RTRMGKYAAVVEVQEMHATGRPILIGTASIEETSELSSLLQ-----     | 467 |
| <i>Chlamydia trachomatis</i>      | 478 | MTEREKYQAI VAEIISAHRSGKPIIGTESVEVSEKLSRILRQ-----   | 520 |
| <i>Treponema pallidum</i>         | 436 | LSEEEKWSAICDEIKAHTRGQPVLVGTISIEKSEKLSALLRT-----    | 478 |
| <i>Borrelia burgdorferi</i>       | 433 | YTEEFKFNATDEVYKTYKKQPVLVGTVSI EKSEILSAMFKN-----    | 475 |
| <i>Corynebacterium glutamicum</i> | 339 | KTQEAKFVAVDDIAERTEKGPVLVGTVSV ERSEYLSQLLTK-----    | 381 |
| <i>Mycobacterium leprae</i>       | 410 | KTEEAKYMAVDDVAERYEKQPVLIGTTSVERSEYLSRQFTK-----     | 452 |
| <i>Clostridium acetobutylicum</i> | 339 | KTELGKFKAVVEDIVETNKNQPVLVGTVSI EKSELSSLLK-----     | 381 |
| <i>Staphylococcus aureus</i>      | 345 | ISQKGFDAVVEDVVEKHKAGQPVLVGTVAVETSEYISNLLK-----     | 387 |
| <i>Listeria innocua</i>           | 409 | TTEAKFNAVEDIADRHAQGPVLVGTVAI ETSELISSKLR-----      | 451 |
| <i>Lactococcus lactis</i>         | 352 | PTLEAKFVAVDDIAERTEKGPVLVGTVSV ERSEYLSQLLTK-----    | 394 |
| <i>Streptococcus pneumoniae</i>   | 410 | ASIESKFKAVVEDVKARYQKQPVLVGTVAVETSDYISKLLVA-----    | 452 |
| <i>Mycoplasma pulmonis</i>        | 408 | WGTRQKLNAILKEVKQVSKTGPVILIGTSQIEQSEQLHQLFDQ-----   | 450 |
| <i>Mycoplasma pneumoniae</i>      | 340 | GTPNIKWLAVVKEVKRIHETGRPILIGTANIDDS ELLHNYLQE-----  | 382 |

\* : : \* \* : \* : : . : . :
