# Supplementary material
Source: PubMed Central journal article supplement (PMC4472001)

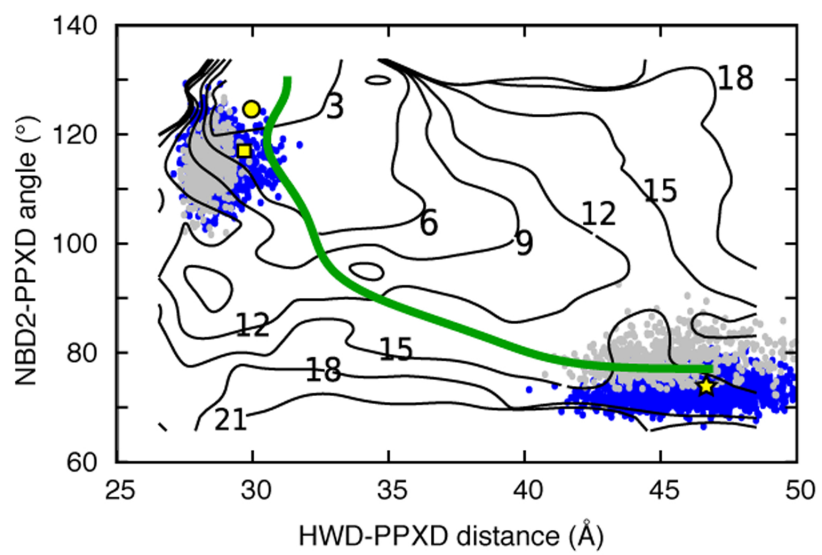

Supplement: NIHMS696743-supplement-1.pdf [file NIHMS696743-supplement-1.pdf]

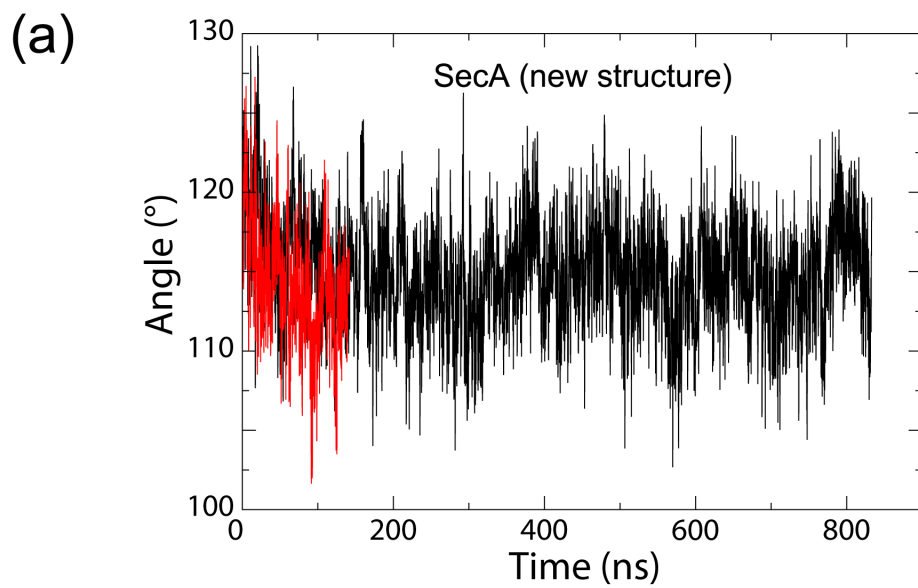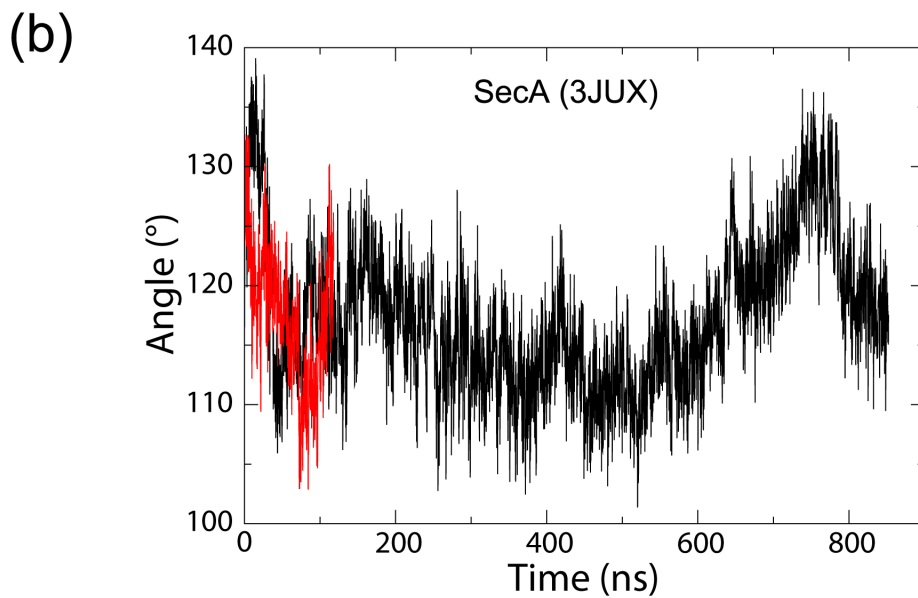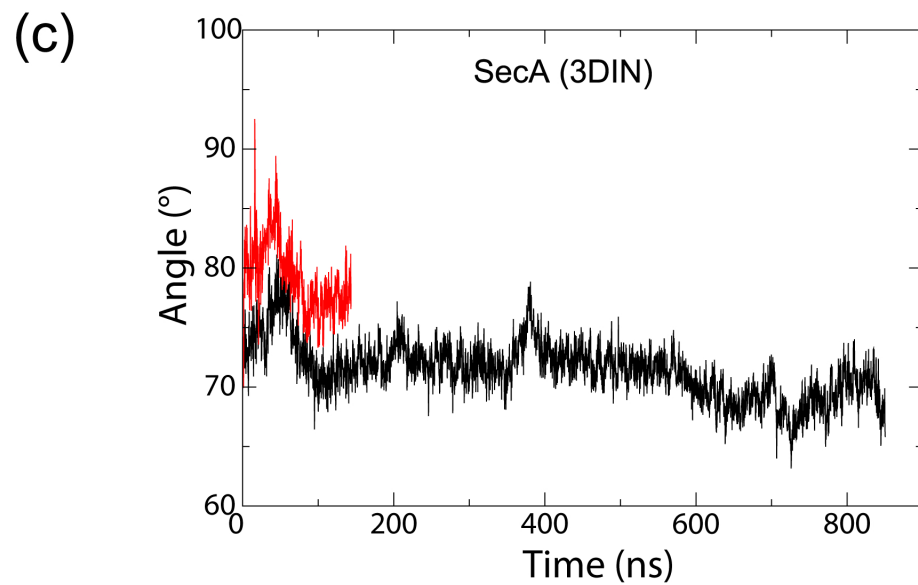

Supplement: NIHMS696743-supplement-2.pdf [file NIHMS696743-supplement-2.pdf]

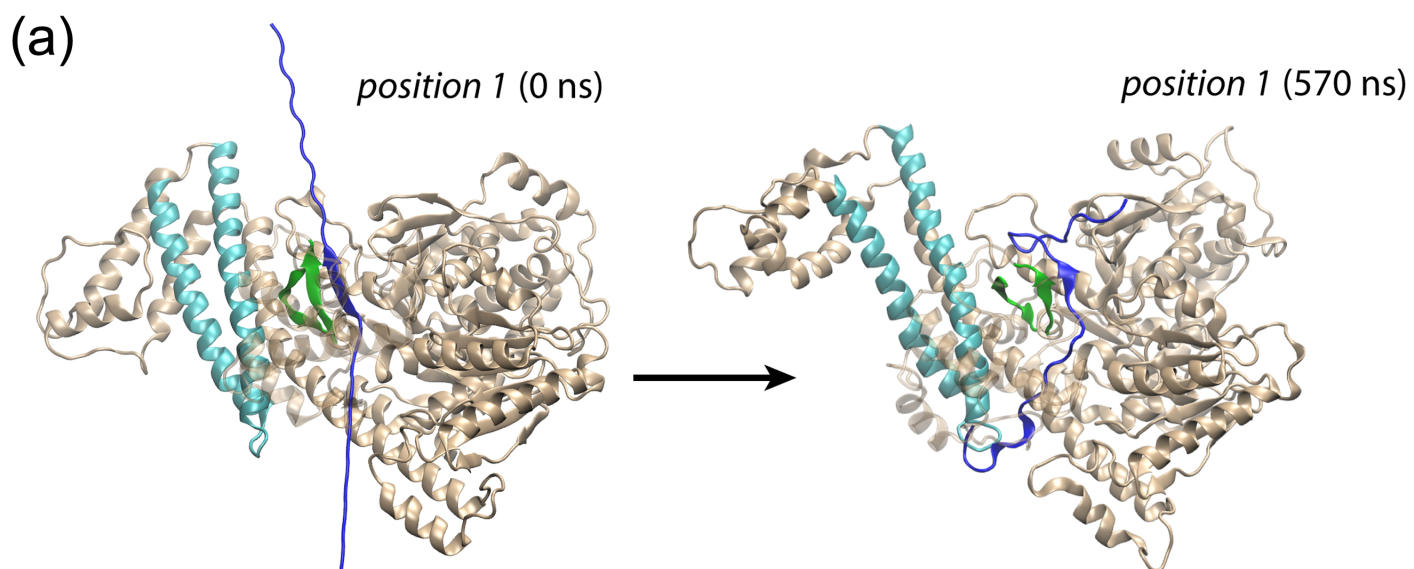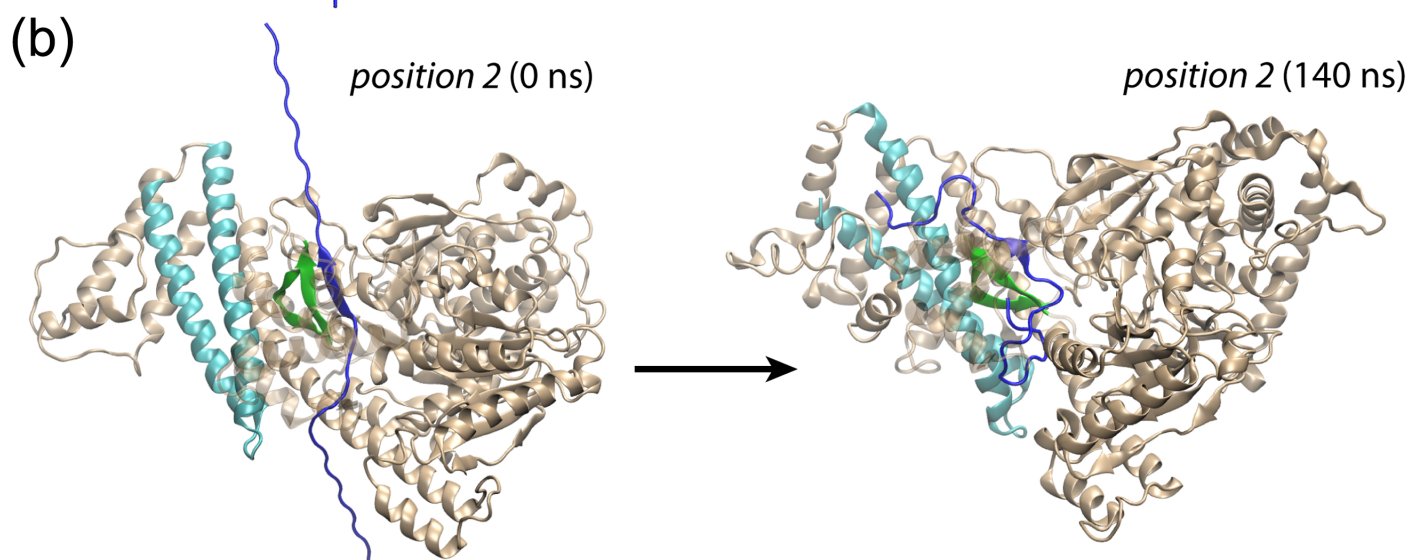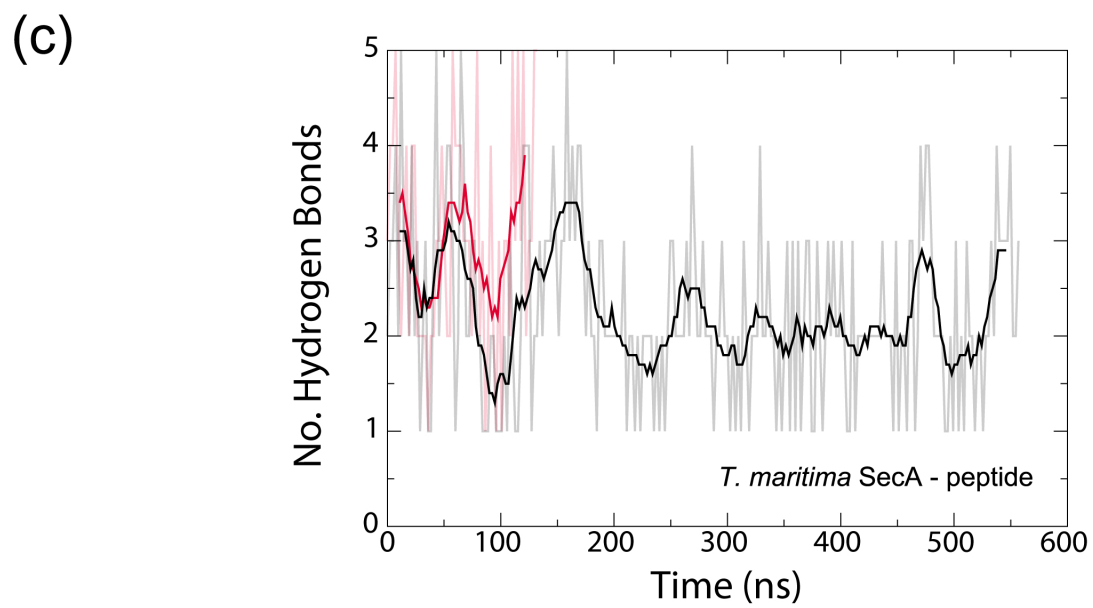

Supplement: NIHMS696743-supplement-3.pdf [file NIHMS696743-supplement-3.pdf]

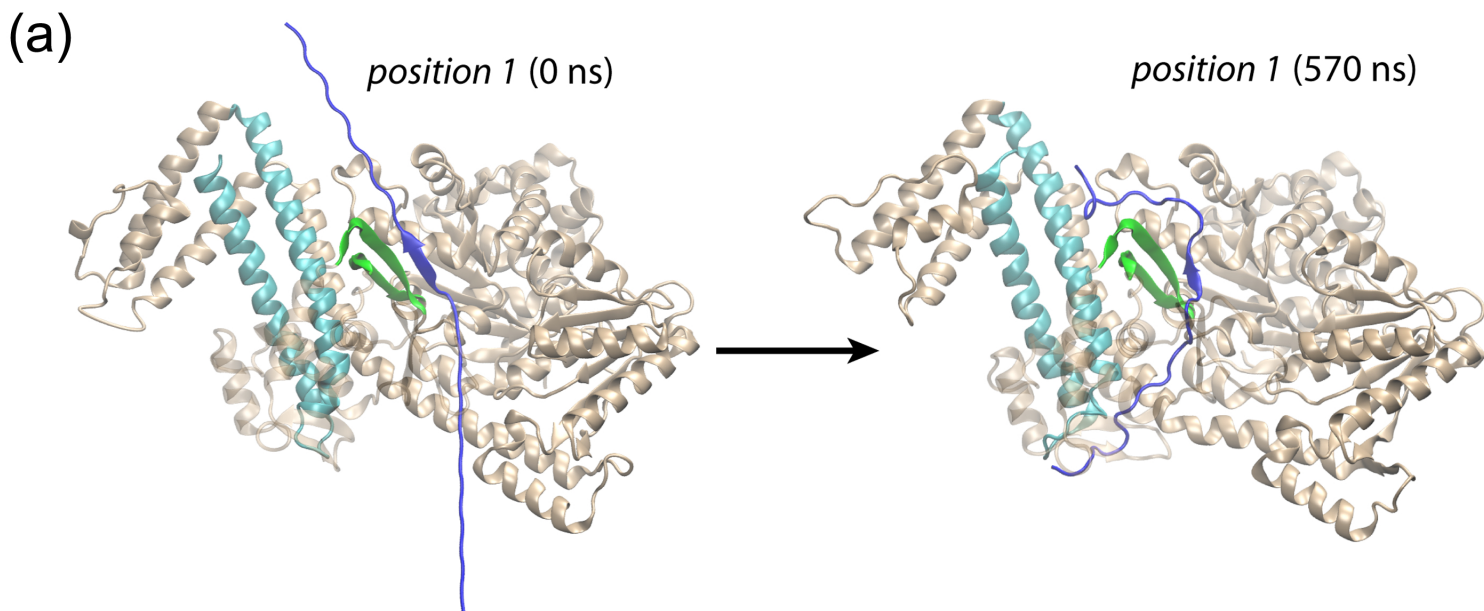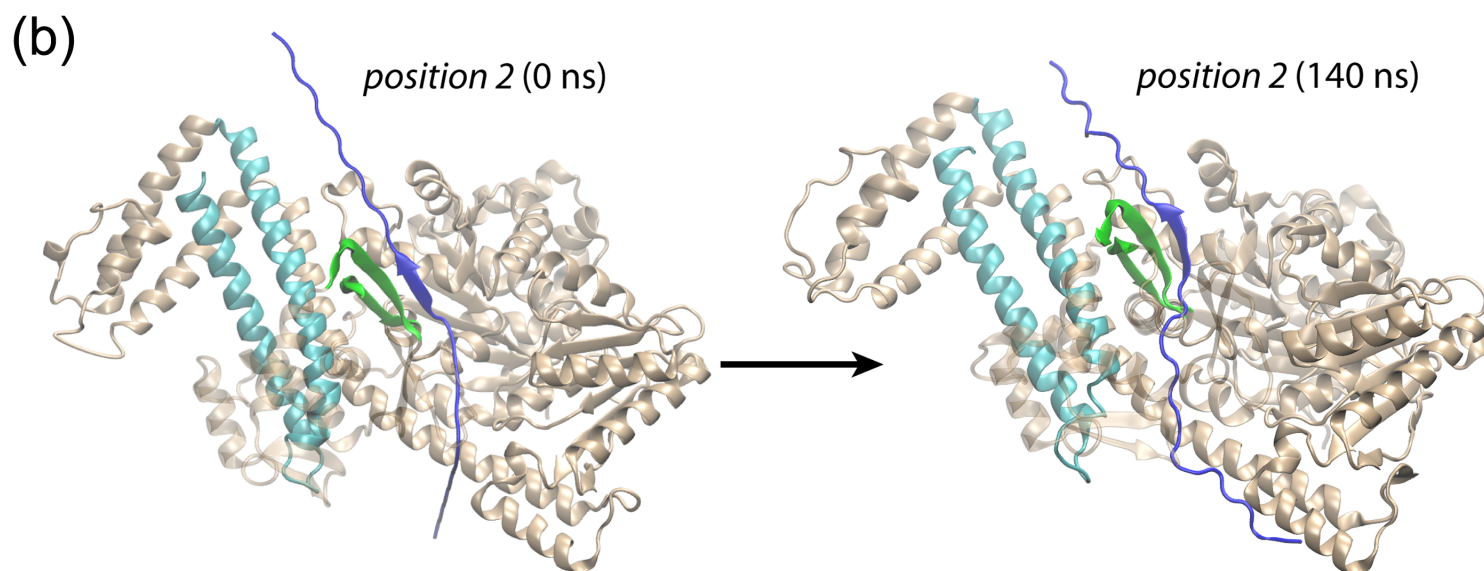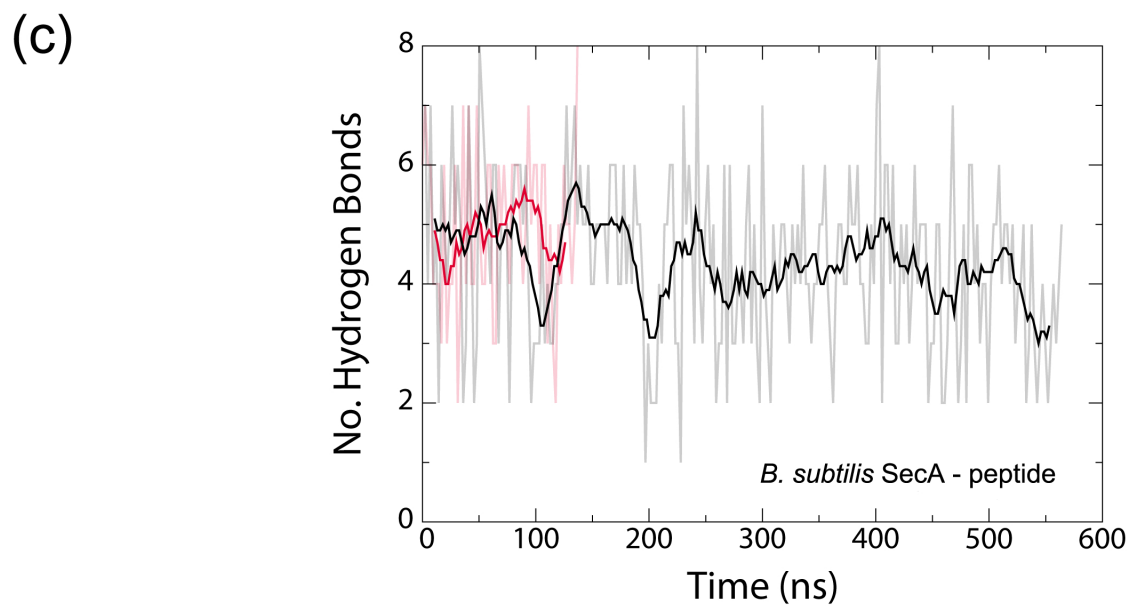

Supplement: NIHMS696743-supplement-4.pdf [file NIHMS696743-supplement-4.pdf]
